# Supplementary material for: Communicator-Driven Data Preprocessing Improves Deep Transfer Learning of Histopathological Prediction of Pancreatic Ductal Adenocarcinoma
Source: MDPI journal article supplement (doi:10.3390/cancers14081964), 2022-04-13
Supplement: s1 [file s1]

Supplementary Figure S1

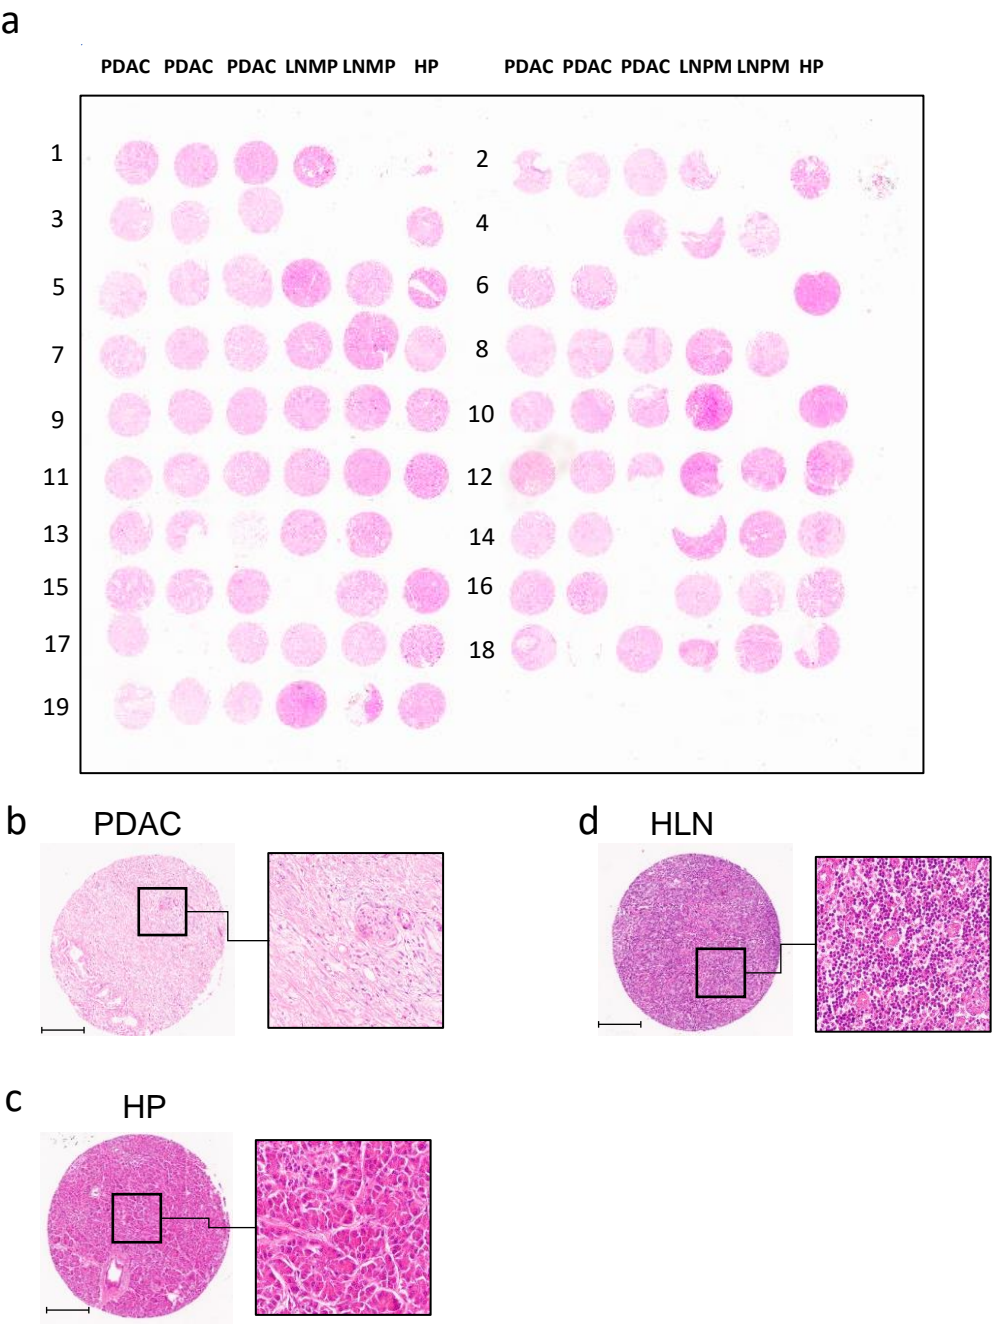

**Supplementary Figure S1: Tissue Micro Arrays enable staining and presentation of multiple patient tissue sections on one histological slide. (a)** TMA with three spots of pancreatic ductal adenocarcinoma (PDAC), two lymph nodes with metastasis from pancreatic ductal adenocarcinoma (LNPM) and one healthy pancreas (HP) per patient are shown. Healthy lymph nodes are on different TMAs. Representative images and zoom from H&E-stained samples of **(b)** pancreatic ductal adenocarcinoma (PDAC), **(c)** healthy pancreas (HP) and **(d)** healthy lymph node (HLN) are shown (Scalebar = 300 μm).

Supplementary Figure S2

a

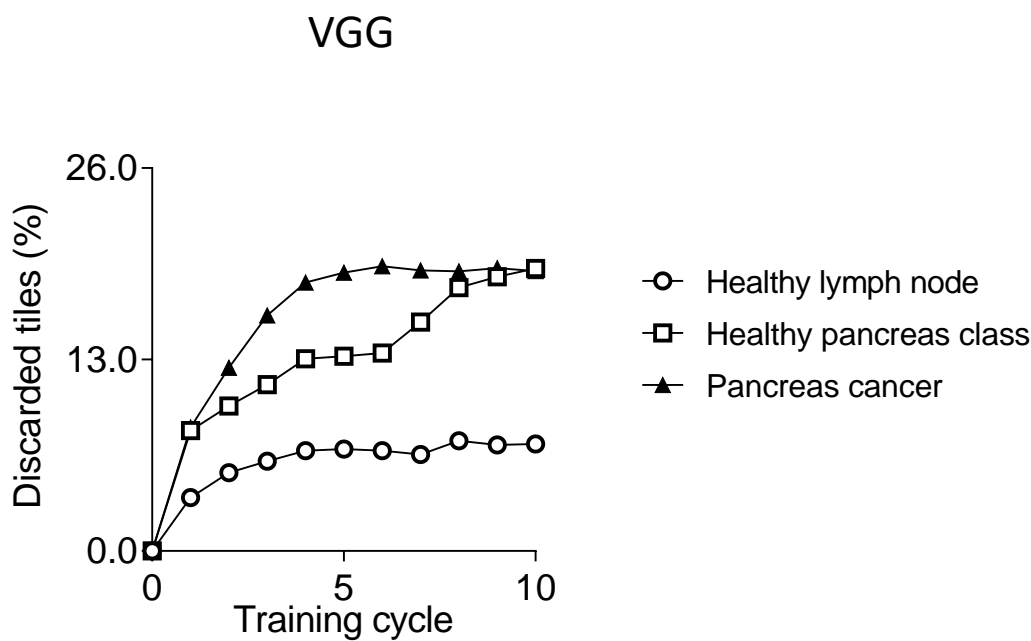

b

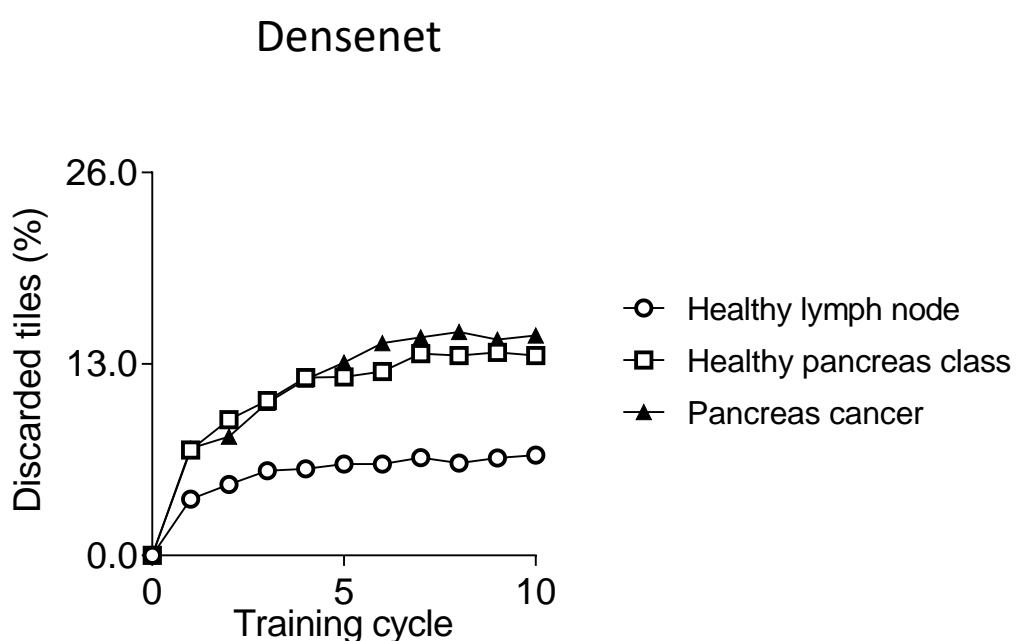

**Supplementary Figure S2: Percentage of discarded image patches of the different tissue types during the cleanup process** from healthy lymph nodes, healthy pancreas and pancreatic ductal adenocarcinoma is indicated for **(a)** VGG and **(b)** Densenet are shown.

# Supplementary Figure S3

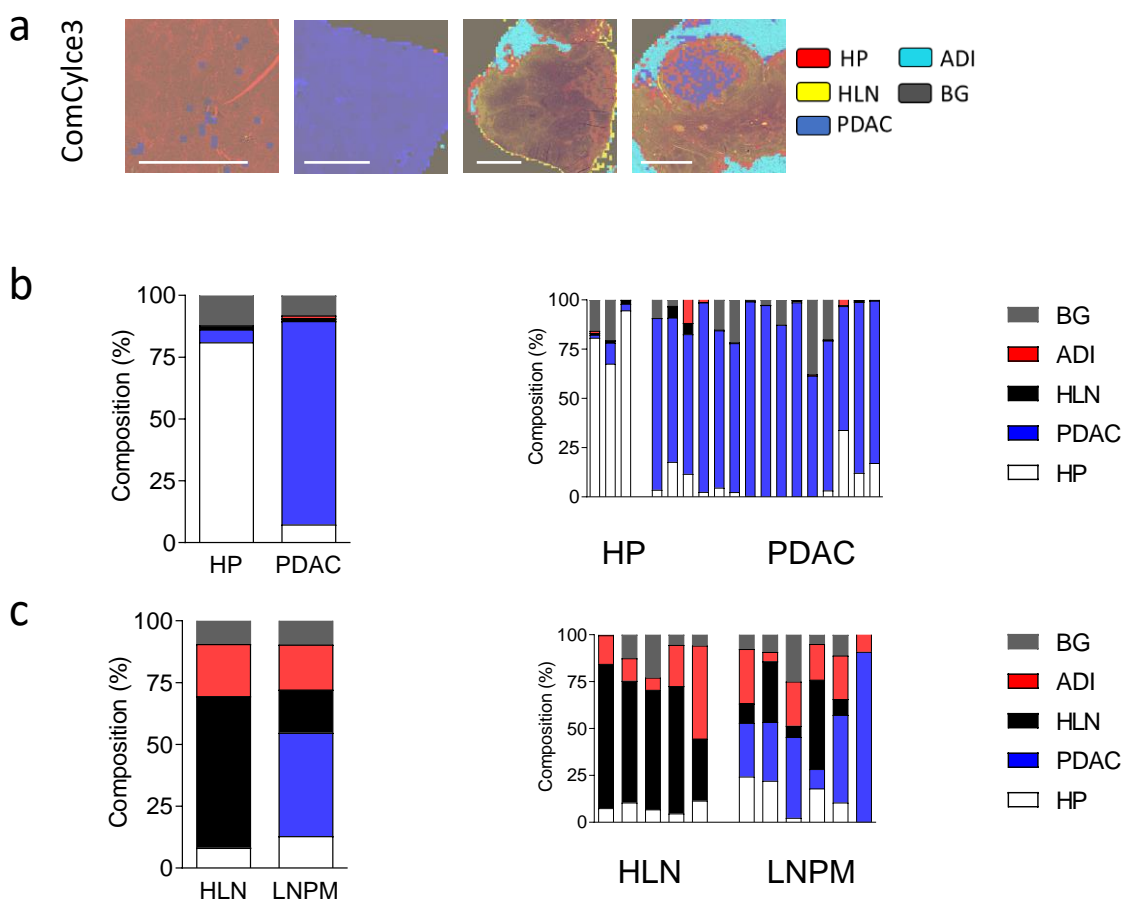

## Supplementary Figure S3: ComCylce3 on the external validation data shows improvement with only 3 cycles.

Colored external validation images with the (a) Baseline model and with the Cutoff Communicators model are shown. (b) Pooled and Individual classification as determined using an cutoff baseline and cutoff cleaned of whole images slides from healthy pancreas (HP) (n=3) and pancreatic ductal adenocarcinoma (PDAC) (n=15) (c) Pooled and Individual classification as determined using an cutoff baseline and cutoff cleaned network of whole images slides from healthy lymph nodes (HLN) (n=5) and lymph nodes with metastasis from pancreatic ductal adenocarcinoma (LNPM) (n=6) are shown.

Supplementary Figure S4

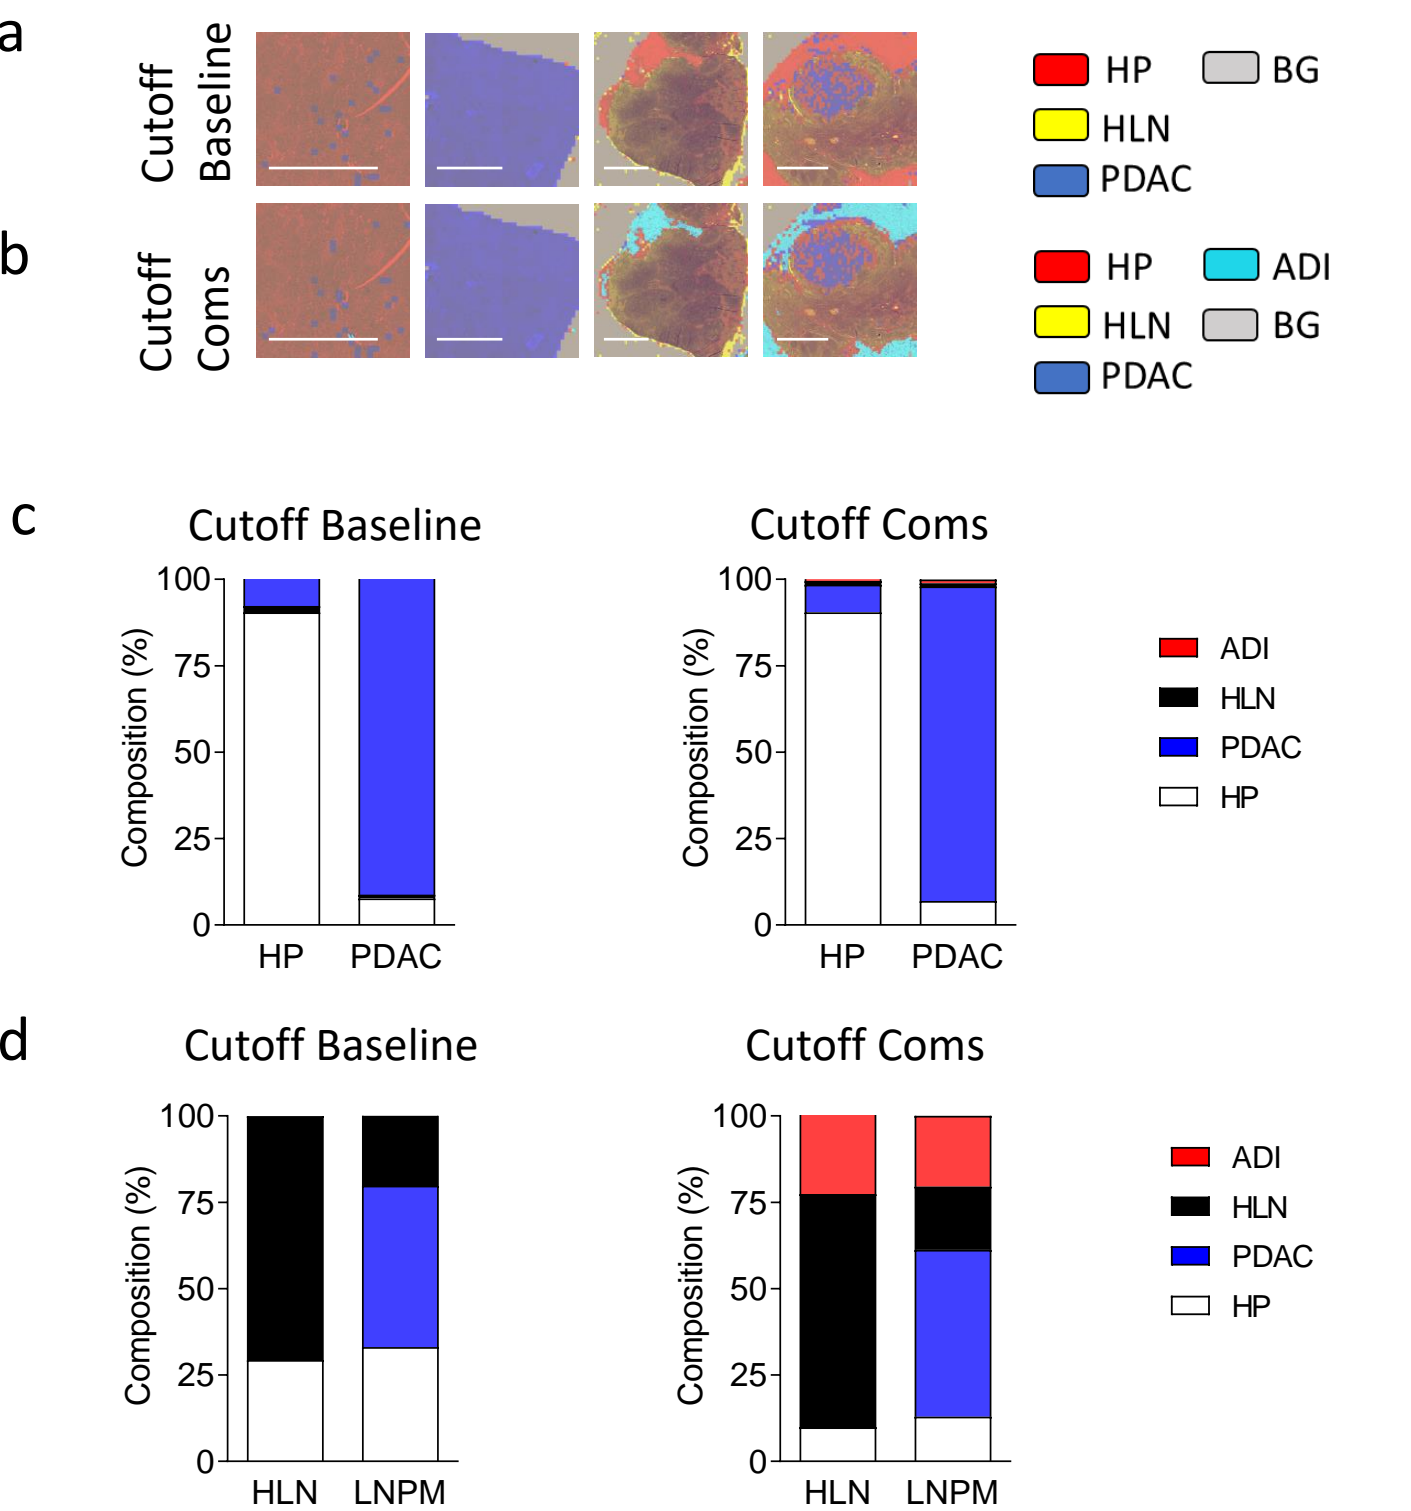

**Supplementary Figure S4: Baseline and Coms with Pixelcutoff instead of background class. Coms still outperform Baseline on the extern validation data with n =10 Cycles for the Communicators.** Colored external validation images with the **(a)** Cutoff Baseline model and **(b)** with the Cutoff Communicators model are shown. **(c)** Pooled classification as determined using an cutoff baseline and cutoff cleaned of whole images slides from healthy pancreas (HP) (n=3) and pancreatic ductal adenocarcinoma (PDAC) (n=15) are shown. **(d)** Pooled classification as determined using an cutoff baseline and cutoff cleaned network of whole images slides from healthy lymph nodes (HLN) (n=5) and lymph nodes with metastasis from pancreatic ductal adenocarcinoma (LNPM) (n=6) are shown.

**a**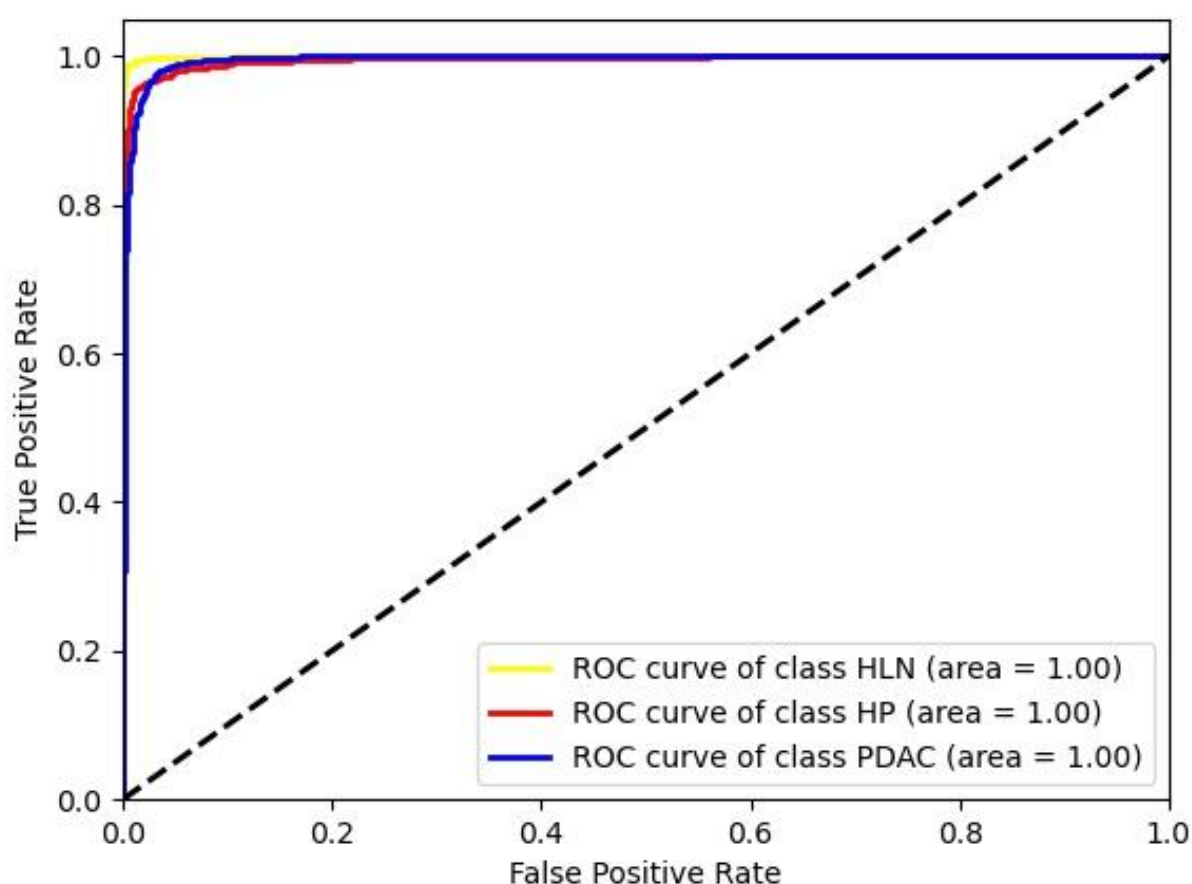**b**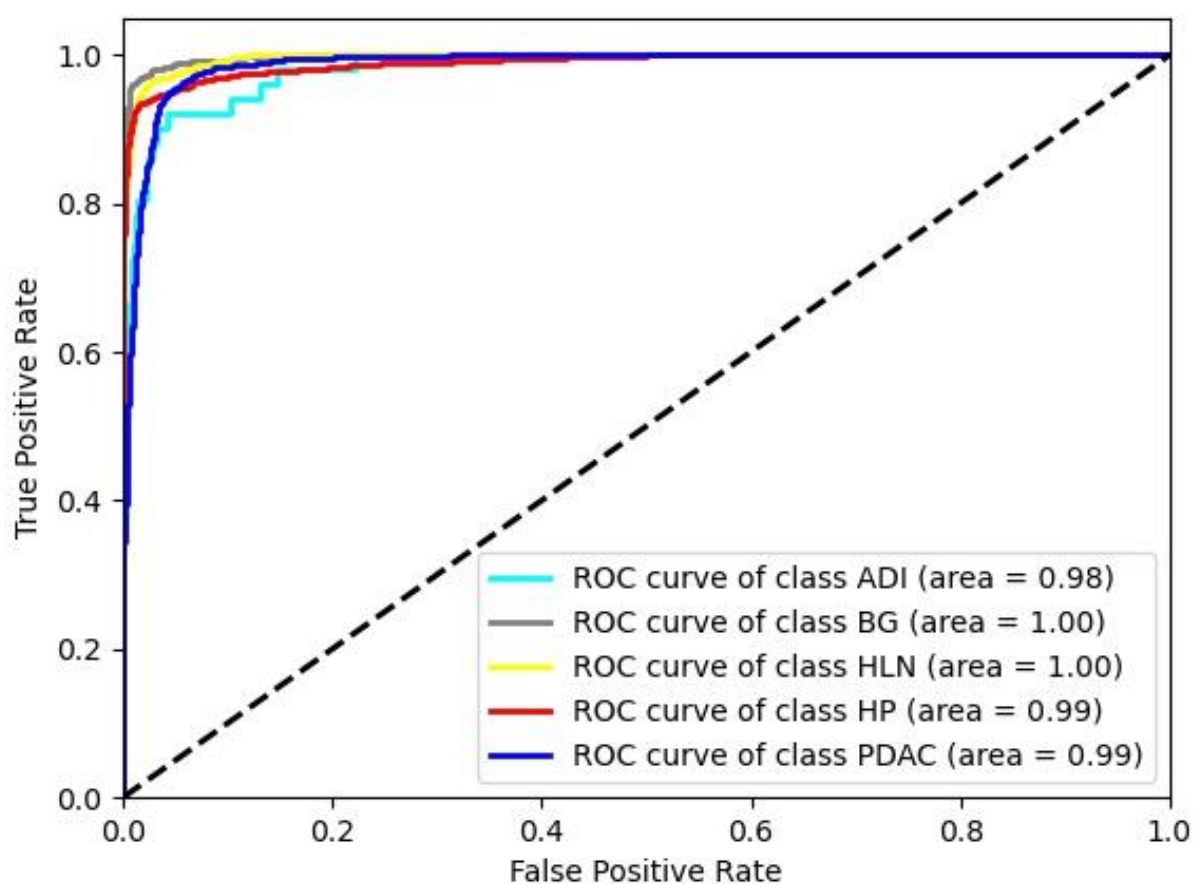

**Supplementary Figure S5: Receiver operating characteristic for the different tissue classes for (a) Baseline evaluated on the cleaned dataset and for the (b) Cleaned network evaluated on the cleaned dataset are shown.**

# Supplementary Table S1

| class | Sex (male(%)/female(%)) | Median Age (range) | Number of Spots | Number of patients |
|-------|-------------------------|--------------------|-----------------|--------------------|
| PDAC  | 52.9 / 47.1             | 68 (41-90)         | 223             | 223                |
| HLN   | anonym                  | anonym             | 76              | 78                 |
| HP    | 52.9 / 47.1             | 68 (41-90)         | 161             | 164                |

**Supplementary Table S1: Patients Data:** Age, Gender and Number of Spots for the three classes healthy pancreas (HP), healthy lymph node (HLN) and Pancreatic ductal adenocarcinoma (PDAC) are provided.

# Supplementary Data

Supplementary Table S2

| class        | precision | recall | f1-score | jaccard-score |
|--------------|-----------|--------|----------|---------------|
| HLN          | 0.03      | 0.03   | 0.07     | 0.05          |
| HP           | 0.07      | 0.09   | 0.11     | 0.13          |
| PDAC         | 0.03      | 0.02   | 0.05     | 0.04          |
| accuracy     |           |        | 0.04     |               |
| macro avg    | 0.01      | -0.03  | -0.01    | 0             |
| weighted avg | 0.04      | 0.04   | 0.04     | 0.08          |

**Supplementary Table S2: Differences of the metrics of the cleaned and uncleaned network:** Accuracy, Precision, Recall, F1-Score and Jaccard score for the classes healthy pancreas (HP), healthy lymph node (HLN) and Pancreatic ductal adenocarcinoma (PDAC) are shown.

# Supplementary Table S3

| Name               | Model     | Patchsize | Batchsize | Optimizer | Learning rate | Cutoff | Com Cycles |
|--------------------|-----------|-----------|-----------|-----------|---------------|--------|------------|
| Baseline           | resnet18  | 224x224x3 | 150       | ADAM      | 0.0001        | No     | -          |
| Cleaned network    | resnet18  | 224x224x3 | 150       | ADAM      | 0.0001        | No     | 10         |
| Inception Baseline | inception | 299x299x3 | 75        | RMSprop   | 0.01          | No     | -          |
| Inception Coms     | inception | 299x299x3 | 75        | RMSprop   | 0.01          | No     | 10         |
| Cutoff Baseline    | resnet18  | 224x224x3 | 150       | ADAM      | 0.0001        | 239    | -          |
| Cutoff Coms        | resnet18  | 224x224x3 | 150       | ADAM      | 0.0001        | 239    | 10         |
| ComCylce3          | resnet18  | 224x224x3 | 150       | ADAM      | 0.0001        | No     | 3          |

**Supplementary Table S3: Overview of the seven CNN configuration used for the experiments.** (Excluding the models from hyperparamter tuning.)



Supplementary Table S4

| model_pre    | model_name | lr       | opt     | balanced accuracy | precision | recall | f1 score | jaccard score | roc_auc_score | HLN score | PDAC score | HP score | LNPM score | test HLN | test PDAC | test HP | four_score | three_score |
|--------------|------------|----------|---------|-------------------|-----------|--------|----------|---------------|---------------|-----------|------------|----------|------------|----------|-----------|---------|------------|-------------|
| alexnet_1    | alexnet    | 0.0001   | ADAM    | 0.857             | 0.944     | 0.945  | 0.944    | 0.896         | 0.994         | 0.969     | 0.89       | 0.978    | 0.997      | 0.945    | 0.959     | 0.928   | 0.958      | 0.944       |
| alexnet_2    | alexnet    | 0.0001   | SGD     | 0.857             | 0.945     | 0.945  | 0.944    | 0.897         | 0.994         | 0.968     | 0.898      | 0.979    | 0.997      | 0.945    | 0.962     | 0.924   | 0.96       | 0.944       |
| alexnet_3    | alexnet    | 0.0001   | RMSprop | 0.831             | 0.937     | 0.937  | 0.935    | 0.881         | 0.988         | 0.944     | 0.942      | 0.985    | 0.989      | 0.943    | 0.965     | 0.898   | 0.965      | 0.935       |
| alexnet_4    | alexnet    | 0.00001  | ADAM    | 0.801             | 0.92      | 0.921  | 0.92     | 0.855         | 0.987         | 0.962     | 0.851      | 0.979    | 0.991      | 0.918    | 0.939     | 0.894   | 0.946      | 0.917       |
| alexnet_5    | alexnet    | 0.00001  | SGD     | 0.797             | 0.919     | 0.92   | 0.918    | 0.853         | 0.987         | 0.963     | 0.842      | 0.978    | 0.989      | 0.918    | 0.935     | 0.896   | 0.943      | 0.916       |
| alexnet_6    | alexnet    | 0.00001  | RMSprop | 0.823             | 0.929     | 0.93   | 0.929    | 0.869         | 0.99          | 0.959     | 0.858      | 0.977    | 0.988      | 0.927    | 0.942     | 0.911   | 0.946      | 0.927       |
| alexnet_7    | alexnet    | 0.000001 | ADAM    | 0.666             | 0.824     | 0.83   | 0.825    | 0.71          | 0.955         | 0.894     | 0.855      | 0.997    | 0.883      | 0.71     | 0.853     | 0.809   | 0.907      | 0.791       |
| alexnet_8    | alexnet    | 0.000001 | SGD     | 0.666             | 0.824     | 0.83   | 0.825    | 0.71          | 0.955         | 0.894     | 0.855      | 0.997    | 0.883      | 0.71     | 0.853     | 0.809   | 0.907      | 0.791       |
| alexnet_9    | alexnet    | 0.000001 | RMSprop | 0.691             | 0.847     | 0.856  | 0.851    | 0.747         | 0.965         | 0.95      | 0.881      | 0.995    | 0.866      | 0.805    | 0.878     | 0.814   | 0.923      | 0.832       |
| densenet_1   | densenet   | 0.0001   | ADAM    | 0.875             | 0.96      | 0.961  | 0.96     | 0.925         | 0.997         | 0.988     | 0.891      | 0.978    | 0.995      | 0.985    | 0.968     | 0.955   | 0.963      | 0.969       |
| densenet_2   | densenet   | 0.0001   | SGD     | 0.876             | 0.962     | 0.962  | 0.961    | 0.927         | 0.997         | 0.987     | 0.895      | 0.977    | 0.996      | 0.987    | 0.97      | 0.956   | 0.964      | 0.971       |
| densenet_3   | densenet   | 0.0001   | RMSprop | 0.877             | 0.964     | 0.964  | 0.963    | 0.931         | 0.997         | 0.982     | 0.861      | 0.97     | 0.996      | 0.984    | 0.975     | 0.952   | 0.952      | 0.97        |
| densenet_4   | densenet   | 0.00001  | ADAM    | 0.773             | 0.928     | 0.926  | 0.923    | 0.862         | 0.986         | 0.984     | 0.939      | 0.992    | 0.911      | 0.914    | 0.952     | 0.905   | 0.956      | 0.924       |
| densenet_5   | densenet   | 0.00001  | SGD     | 0.773             | 0.928     | 0.926  | 0.923    | 0.862         | 0.986         | 0.984     | 0.939      | 0.992    | 0.911      | 0.914    | 0.951     | 0.905   | 0.956      | 0.923       |
| densenet_6   | densenet   | 0.00001  | RMSprop | 0.82              | 0.938     | 0.937  | 0.936    | 0.882         | 0.99          | 0.989     | 0.947      | 0.992    | 0.959      | 0.938    | 0.962     | 0.913   | 0.972      | 0.938       |
| densenet_7   | densenet   | 0.000001 | ADAM    | 0.649             | 0.794     | 0.629  | 0.668    | 0.523         | 0.905         | 0.901     | 0.457      | 0.951    | 0.86       | 0.679    | 0.363     | 0.793   | 0.792      | 0.612       |
| densenet_8   | densenet   | 0.000001 | SGD     | 0.649             | 0.794     | 0.629  | 0.668    | 0.523         | 0.905         | 0.901     | 0.457      | 0.951    | 0.86       | 0.679    | 0.363     | 0.793   | 0.792      | 0.612       |
| densenet_9   | densenet   | 0.000001 | RMSprop | 0.729             | 0.839     | 0.765  | 0.791    | 0.662         | 0.939         | 0.934     | 0.714      | 0.99     | 0.986      | 0.782    | 0.635     | 0.841   | 0.906      | 0.753       |
| resnet_1     | resnet     | 0.0001   | ADAM    | 0.877             | 0.947     | 0.947  | 0.947    | 0.9           | 0.994         | 0.99      | 0.942      | 0.998    | 0.981      | 0.946    | 0.962     | 0.93    | 0.978      | 0.946       |
| resnet_2     | resnet     | 0.0001   | SGD     | 0.877             | 0.947     | 0.947  | 0.947    | 0.9           | 0.994         | 0.99      | 0.942      | 0.998    | 0.981      | 0.946    | 0.962     | 0.93    | 0.978      | 0.946       |
| resnet_3     | resnet     | 0.0001   | RMSprop | 0.871             | 0.948     | 0.949  | 0.948    | 0.903         | 0.995         | 0.98      | 0.933      | 0.999    | 0.981      | 0.95     | 0.963     | 0.935   | 0.973      | 0.949       |
| resnet_4     | resnet     | 0.00001  | ADAM    | 0.792             | 0.917     | 0.916  | 0.914    | 0.844         | 0.983         | 0.944     | 0.963      | 0.97     | 0.962      | 0.906    | 0.939     | 0.878   | 0.96       | 0.908       |
| resnet_5     | resnet     | 0.00001  | SGD     | 0.792             | 0.917     | 0.916  | 0.914    | 0.844         | 0.983         | 0.944     | 0.963      | 0.97     | 0.962      | 0.906    | 0.939     | 0.878   | 0.96       | 0.908       |
| resnet_6     | resnet     | 0.00001  | RMSprop | 0.824             | 0.927     | 0.927  | 0.926    | 0.864         | 0.987         | 0.958     | 0.958      | 0.983    | 0.986      | 0.921    | 0.949     | 0.894   | 0.971      | 0.921       |
| resnet_7     | resnet     | 0.000001 | ADAM    | 0.506             | 0.705     | 0.659  | 0.641    | 0.489         | 0.899         | 0.402     | 0.892      | 0.6      | 0.994      | 0.203    | 0.735     | 0.616   | 0.722      | 0.518       |
| resnet_8     | resnet     | 0.000001 | SGD     | 0.506             | 0.705     | 0.659  | 0.641    | 0.489         | 0.899         | 0.402     | 0.892      | 0.6      | 0.994      | 0.203    | 0.735     | 0.616   | 0.722      | 0.518       |
| resnet_9     | resnet     | 0.000001 | RMSprop | 0.619             | 0.787     | 0.782  | 0.775    | 0.64          | 0.937         | 0.518     | 0.954      | 0.796    | 0.932      | 0.545    | 0.829     | 0.748   | 0.8        | 0.707       |
| resnet101_1  | resnet101  | 0.0001   | ADAM    | 0.872             | 0.951     | 0.951  | 0.951    | 0.908         | 0.994         | 0.992     | 0.849      | 0.982    | 0.938      | 0.971    | 0.953     | 0.949   | 0.94       | 0.958       |
| resnet101_2  | resnet101  | 0.0001   | SGD     | 0.872             | 0.951     | 0.952  | 0.951    | 0.909         | 0.994         | 0.992     | 0.849      | 0.981    | 0.938      | 0.971    | 0.954     | 0.95    | 0.94       | 0.958       |
| resnet101_3  | resnet101  | 0.0001   | RMSprop | 0.861             | 0.951     | 0.951  | 0.951    | 0.909         | 0.994         | 0.999     | 0.869      | 0.996    | 0.944      | 0.976    | 0.958     | 0.943   | 0.952      | 0.959       |
| resnet101_4  | resnet101  | 0.00001  | ADAM    | 0.794             | 0.932     | 0.93   | 0.928    | 0.869         | 0.989         | 0.824     | 0.923      | 0.987    | 0.964      | 0.931    | 0.964     | 0.895   | 0.924      | 0.93        |
| resnet101_5  | resnet101  | 0.00001  | SGD     | 0.794             | 0.932     | 0.93   | 0.928    | 0.869         | 0.989         | 0.824     | 0.923      | 0.987    | 0.964      | 0.931    | 0.964     | 0.895   | 0.924      | 0.93        |
| resnet101_6  | resnet101  | 0.00001  | RMSprop | 0.833             | 0.933     | 0.933  | 0.932    | 0.875         | 0.991         | 0.903     | 0.89       | 0.989    | 0.939      | 0.943    | 0.954     | 0.906   | 0.93       | 0.934       |
| resnet101_7  | resnet101  | 0.000001 | ADAM    | 0.624             | 0.764     | 0.681  | 0.675    | 0.522         | 0.942         | 0.68      | 0.551      | 0.976    | 0.675      | 0.715    | 0.438     | 0.847   | 0.72       | 0.667       |
| resnet101_8  | resnet101  | 0.000001 | SGD     | 0.624             | 0.764     | 0.681  | 0.675    | 0.522         | 0.942         | 0.68      | 0.551      | 0.976    | 0.675      | 0.715    | 0.438     | 0.847   | 0.72       | 0.667       |
| resnet101_9  | resnet101  | 0.000001 | RMSprop | 0.694             | 0.843     | 0.842  | 0.839    | 0.729         | 0.959         | 0.644     | 0.853      | 0.989    | 0.974      | 0.794    | 0.808     | 0.865   | 0.865      | 0.822       |
| resnet50_1   | resnet50   | 0.0001   | ADAM    | 0.874             | 0.952     | 0.952  | 0.952    | 0.91          | 0.996         | 0.985     | 0.926      | 0.984    | 0.982      | 0.97     | 0.972     | 0.93    | 0.969      | 0.957       |
| resnet50_2   | resnet50   | 0.0001   | SGD     | 0.866             | 0.951     | 0.951  | 0.951    | 0.908         | 0.996         | 0.986     | 0.93       | 0.984    | 0.976      | 0.971    | 0.966     | 0.939   | 0.969      | 0.959       |
| resnet50_3   | resnet50   | 0.0001   | RMSprop | 0.872             | 0.955     | 0.956  | 0.955    | 0.916         | 0.996         | 0.999     | 0.923      | 0.981    | 0.968      | 0.968    | 0.974     | 0.945   | 0.968      | 0.962       |
| resnet50_4   | resnet50   | 0.00001  | ADAM    | 0.792             | 0.937     | 0.935  | 0.933    | 0.878         | 0.988         | 0.903     | 0.973      | 0.993    | 0.975      | 0.943    | 0.961     | 0.909   | 0.961      | 0.938       |
| resnet50_5   | resnet50   | 0.00001  | SGD     | 0.792             | 0.937     | 0.935  | 0.933    | 0.878         | 0.988         | 0.903     | 0.973      | 0.993    | 0.975      | 0.943    | 0.961     | 0.909   | 0.961      | 0.938       |
| resnet50_6   | resnet50   | 0.00001  | RMSprop | 0.827             | 0.94      | 0.94   | 0.939    | 0.887         | 0.991         | 0.937     | 0.965      | 0.993    | 0.999      | 0.954    | 0.962     | 0.914   | 0.974      | 0.943       |
| resnet50_7   | resnet50   | 0.000001 | ADAM    | 0.611             | 0.808     | 0.796  | 0.782    | 0.653         | 0.944         | 0.626     | 0.979      | 0.826    | 0.765      | 0.475    | 0.949     | 0.679   | 0.799      | 0.701       |
| resnet50_8   | resnet50   | 0.000001 | SGD     | 0.611             | 0.808     | 0.796  | 0.782    | 0.653         | 0.944         | 0.626     | 0.979      | 0.826    | 0.765      | 0.475    | 0.949     | 0.679   | 0.799      | 0.701       |
| resnet50_9   | resnet50   | 0.000001 | RMSprop | 0.674             | 0.859     | 0.855  | 0.848    | 0.743         | 0.958         | 0.756     | 0.982      | 0.901    | 0.779      | 0.701    | 0.955     | 0.76    | 0.854      | 0.805       |
| squeezenet_1 | squeezenet | 0.0001   | ADAM    | 0.833             | 0.933     | 0.933  | 0.931    | 0.874         | 0.99          | 0.953     | 0.945      | 0.988    | 0.996      | 0.938    | 0.954     | 0.895   | 0.97       | 0.929       |
| squeezenet_2 | squeezenet | 0.0001   | SGD     | 0.832             | 0.932     | 0.932  | 0.931    | 0.873         | 0.99          | 0.952     | 0.947      | 0.988    | 0.999      | 0.937    | 0.954     | 0.894   | 0.972      | 0.928       |
| squeezenet_3 | squeezenet | 0.0001   | RMSprop | 0.803             | 0.924     | 0.925  | 0.923    | 0.861         | 0.987         | 0.999     | 0.943      | 0.993    | 0.945      | 0.927    | 0.949     | 0.887   | 0.97       | 0.921       |
| squeezenet_4 | squeezenet | 0.00001  | ADAM    | 0.768             | 0.895     | 0.888  | 0.89     | 0.807         | 0.971         | 0.973     | 0.959      | 0.941    | 0.938      | 0.877    | 0.907     | 0.846   | 0.953      | 0.877       |
| squeezenet_5 | squeezenet | 0.00001  | SGD     | 0.768             | 0.895     | 0.889  | 0.89     | 0.807         | 0.971         | 0.973     | 0.959      | 0.941    | 0.938      | 0.877    | 0.907     | 0.846   | 0.953      | 0.877       |
| squeezenet_6 | squeezenet | 0.00001  | RMSprop | 0.784             | 0.904     | 0.902  | 0.902    | 0.825         | 0.977         | 0.969     | 0.959      | 0.944    | 0.978      | 0.88     | 0.931     | 0.856   | 0.962      | 0.889       |
| squeezenet_7 | squeezenet | 0.000001 | ADAM    | 0.342             | 0.453     | 0.47   | 0.454    | 0.321         | 0.665         | 0.384     | 0.727      | 0.635    | 0.701      | 0.005    | 0.666     | 0.324   | 0.612      | 0.332       |
| squeezenet_8 | squeezenet | 0.000001 | SGD     | 0.343             | 0.453     | 0.471  | 0.454    | 0.321         | 0.665         | 0.384     | 0.727      | 0.635    | 0.701      | 0.005    | 0.666     | 0.325   | 0.612      | 0.332       |
| squeezenet_9 | squeezenet | 0.000001 | RMSprop | 0.464             | 0.597     | 0.626  | 0.602    | 0.466         | 0.801         | 0.428     | 0.854      | 0.696    | 0.634      | 0.09     | 0.77      | 0.555   | 0.653      | 0.472       |
| vgg16_1      | vgg16      | 0.0001   | ADAM    | 0.884             | 0.957     | 0.957  | 0.957    | 0.919         | 0.997         | 0.987     | 0.797      | 0.971    | 0.952      | 0.963    | 0.953     | 0.967   | 0.927      | 0.961       |
| vgg16_2      | vgg16      | 0.0001   | SGD     | 0.881             | 0.957     | 0.958  | 0.957    | 0.92          | 0.997         | 0.988     | 0.811      | 0.973    | 0.96       | 0.963    | 0.954     | 0.966   | 0.933      | 0.961       |
| vgg16_3      | vgg16      | 0.0001   | RMSprop | 0.871             | 0.959     | 0.96   | 0.959    | 0.924         | 0.997         | 0.986     | 0.818      | 0.972    | 0.939      | 0.971    | 0.963     | 0.96    | 0.929      | 0.965       |
| vgg16_4      | vgg16      | 0.00001  | ADAM    | 0.859             | 0.939     | 0.94   | 0.939    | 0.887         | 0.992         | 0.991     | 0.823      | 0.974    | 0.99       | 0.96     | 0.948     | 0.922   | 0.945      | 0.943       |
| vgg16_5      | vgg16      | 0.00001  | SGD     | 0.858             | 0.939     | 0.939  | 0.939    | 0.886         | 0.992         | 0.992     | 0.823      | 0.974    | 0.99       | 0.96     | 0.948     | 0.922   | 0.945      | 0.943       |
| vgg16_6      | vgg16      | 0.00001  | RMSprop | 0.872             | 0.942     | 0.942  | 0.942    | 0.892         | 0.994         | 0.989     | 0.785      | 0.973    | 0.974      | 0.96     | 0.947     | 0.93    | 0.93       | 0.946       |
| vgg16_7      | vgg16      | 0.000001 | ADAM    | 0.676             | 0.862     | 0.856  | 0.85     | 0.746         | 0.961         | 0.875     | 0.991      | 0.949    | 0.948      | 0.761    | 0.979     | 0.717   | 0.891      | 0.819       |
| vgg16_8      | vgg16      | 0.000001 | SGD     | 0.678             | 0.864     | 0.858  | 0.852    | 0.749         | 0.962         | 0.88      | 0.992      | 0.952    | 0.749      | 0.772    | 0.979     | 0.719   | 0.893      | 0.823       |
| vgg16_9      | vgg16      | 0.000001 | RMSprop | 0.72              | 0.891     | 0.895  | 0.89     | 0.809         | 0.974         | 0.951     | 0.966      | 0.992    | 0.805      | 0.884    | 0.954     | 0.814   | 0.928      | 0.884       |
| vgg19_1      | vgg19      | 0.0001   | ADAM    | 0.876             | 0.962     | 0.962  | 0.962    | 0.929         | 0.997         | 0.975     | 0.867      | 0.978    | 0.976      | 0.975    | 0.97      | 0.962   | 0.949      | 0.969       |
| vgg19_2      | vgg19      | 0.0001   |         |                   |           |        |          |               |               |           |            |          |            |          |           |         |            |             |
